# Supplementary material for: Synthesis, crystal structure and luminescence of a near ultraviolet-green to red spectral converter BaY2S4:Eu2+, Er3+
Source: Royal Society of Chemistry journal article supplement (doi:10.1039/c3ra42871k), 2013-01-01
Supplement: c3ra42871k.pdf [file c3ra42871k.pdf]

Electronic Supplementary Information (ESI)

**Synthesis, Crystal Structure and Luminescence Process of A  
Near Ultraviolet-Green to Red Spectral Converter BaY<sub>2</sub>S<sub>4</sub>:  
Eu<sup>2+</sup>, Er<sup>3+</sup>†**

Wenli Zhou, Shengzhi Deng, Chunying Rong, Qingji Xie, Shixun Lian,\* Jilin Zhang, Chengzhi Li  
and Liping Yu

*Key Laboratory of Chemical Biology & Traditional Chinese Medicine Research (Ministry of  
Education); Key Laboratory of Sustainable Resources Processing and Advanced Materials of  
Hunan Province, College of Chemistry and Chemical Engineering, Hunan Normal University,  
Changsha, Hunan 410081, China.*

E-mail: [lianshixun@yahoo.com.cn](mailto:lianshixun@yahoo.com.cn);

**Table S1.** Cell Constants *a*, *b*, *c* (in angstroms), and *V* (in cubic angstroms) and Atomic Coordinates (*x*, *y*, *z*) of BaY<sub>1.76</sub>Er<sub>0.24</sub>S<sub>4</sub> Compound.

| Compound                                                           | <i>a</i> / <i>x</i> | <i>b</i> / <i>y</i> | <i>c</i> / <i>z</i> | <i>V</i> |
|--------------------------------------------------------------------|---------------------|---------------------|---------------------|----------|
| BaY <sub>1.76</sub> Er <sub>0.24</sub> S <sub>4</sub> <sup>a</sup> | 4.0250(4)           | 12.2096(1)          | 14.4723(1)          | 711.23   |
| Y1(Er1)                                                            | 0.25                | 0.0668(1)           | 0.3916(5)           |          |
| Y2(Er2)                                                            | 0.25                | 0.0785(9)           | 0.8976(0)           |          |
| Ba                                                                 | 0.25                | 0.2419(5)           | 0.1617(8)           |          |
| S1                                                                 | 0.75                | 0.0232(8)           | 0.7845(5)           |          |
| S2                                                                 | 0.75                | 0.0845(3)           | 0.5763(8)           |          |
| S3                                                                 | 0.75                | 0.1243(7)           | 0.0232(2)           |          |
| S4                                                                 | 0.75                | 0.2082(6)           | 0.3354(6)           |          |
| BaY <sub>2</sub> S <sub>4</sub> <sup>b</sup>                       | 4.0263              | 12.2134             | 14.484              | 712.248  |
| Y1                                                                 | 0.25                | 0.0672(7)           | 0.3915(1)           |          |
| Y2                                                                 | 0.25                | 0.0791(1)           | 0.8984(6)           |          |
| Ba                                                                 | 0.25                | 0.2423(5)           | 0.1616(8)           |          |
| S1                                                                 | 0.75                | 0.0217(3)           | 0.7830(4)           |          |
| S2                                                                 | 0.25                | 0.0819(8)           | 0.5771(6)           |          |
| S3                                                                 | 0.75                | 0.1251(0)           | 0.0234(5)           |          |
| S4                                                                 | 0.75                | 0.2073(8)           | 0.3359(5)           |          |

<sup>a</sup> Data determined from powder XRD data by using the Rietveld refinement. The compound crystallizes in No. 62 space group (*Pmnb*) within an orthorhombic symmetry. *Z* = 4.  $\alpha = \beta = \gamma = 90^\circ$ . The reliability factors of the refinement for BaY<sub>1.76</sub>Er<sub>0.24</sub>S<sub>4</sub> are  $R_p = 2.7\%$  and  $R_{wp} = 3.9\%$ .

<sup>b</sup> Experimental data reported by Lowe-Ma et al.

**Table S2.** Bond Lengths (in angstroms) of BaY<sub>1.76</sub>Er<sub>0.24</sub>S<sub>4</sub> Compound.

|            |         |            |         |
|------------|---------|------------|---------|
| Y1(Er1)-S2 | 2.68221 | Y2(Er2)-S2 | 2.68013 |
| Y1(Er1)-S2 | 2.77104 | Y2(Er2)-S2 | 2.68013 |
| Y1(Er1)-S2 | 2.77104 | Y2(Er2)-S3 | 2.73019 |
| Y1(Er1)-S4 | 2.77385 | Y2(Er2)-S4 | 2.75348 |
| Y1(Er1)-S4 | 2.77385 | Y2(Er2)-S3 | 2.76909 |
| Y1(Er1)-S1 | 2.77714 | Y2(Er2)-S3 | 2.76909 |
| Ba-S1      | 3.33020 | Ba-S1      | 3.37250 |
| Ba-S2      | 3.17274 | Ba-S2      | 3.17274 |
| Ba-S3      | 3.18314 | Ba-S3      | 3.18314 |
| Ba-S4      | 3.24610 | Ba-S4      | 3.24610 |

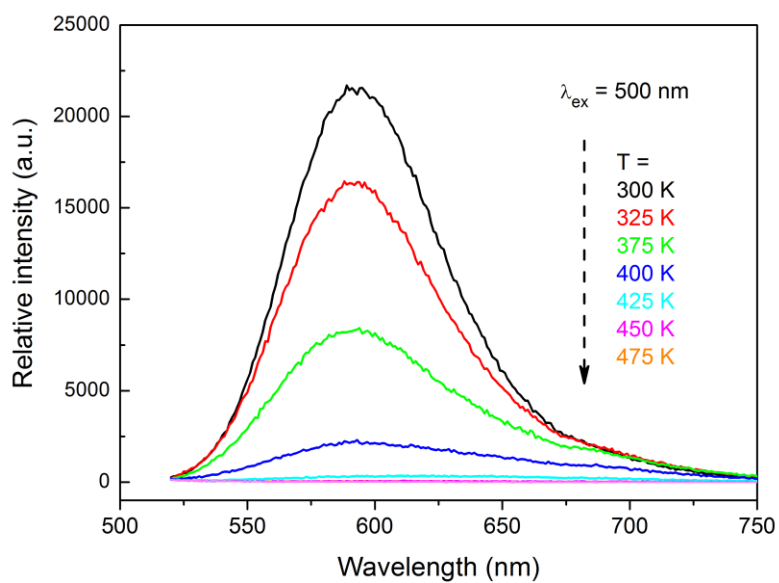

**Figure S1** Temperature dependence of  $\text{Eu}^{2+}$  luminescence in  $\text{BY5}: 0.0025\text{Eu}^{2+}$  sample.

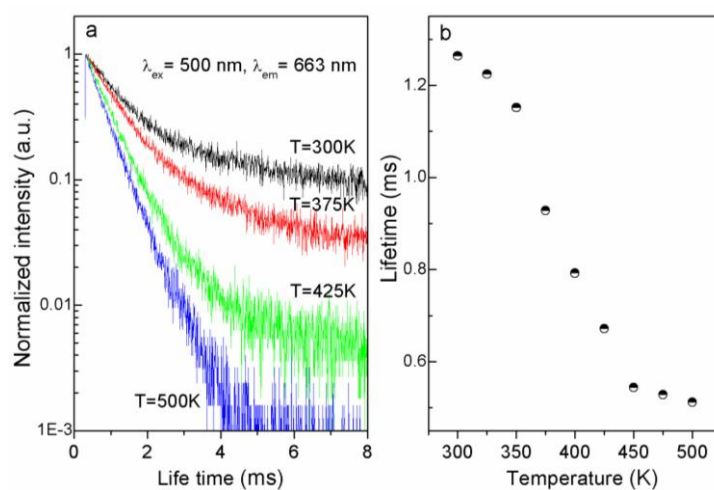

**Figure S2** (a) Luminescence decay curves of  $\text{BY5}: 0.0025\text{Eu}^{2+}, 0.24\text{Er}^{3+}$  phosphor under the excitation of 500 nm at range of 300 - 500 K and (b) the temperature dependent lifetimes of the  $\text{Er}^{3+}$  emission.

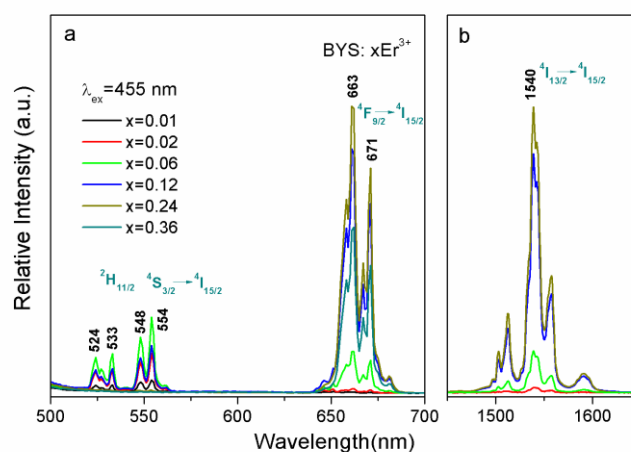

**Figure S3** Visible (a) and near-infrared (b) emission spectra of  $\text{BaY}_{2-x}\text{S}_4: x\text{Er}^{3+}$  phosphor as a function of the concentration of  $\text{Er}^{3+}$  ions upon the excitation of 455 nm.

Figure S3 shows the photoluminescence (PL) spectra of the  $\text{Ba}_{2-x}\text{Y}_2\text{S}_4: x\% \text{Er}^{3+}$  phosphors with  $x=0.01, 0.02, 0.06, 0.12, 0.24$  and  $0.36$  obtained at room temperature by using an excitation wavelength ( $\lambda_{\text{ex}}$ ) of 455 nm. Under this excitation condition, four emission peaks at 524, 548, 661, and 1540 nm can be distinguished. They are associated with the radiative  $\text{Er}^{3+}$  ions de-excitation from the states  $^2H_{11/2}$ ,  $^4S_{3/2}$ ,  $^4F_{9/2}$ , and  $^4I_{13/2}$  to the ground state  $^4I_{15/2}$ , respectively. In the most dilute  $\text{Er}^{3+}$ -containing ( $x = 0.01$ )  $\text{BaY}_2\text{S}_4$ , the PL is prominent at 554 nm, the peaks at 661 and 1540 nm are almost negligible. With increasing  $\text{Er}^{3+}$  concentration, the green emission intensities initially increase and then reach a maximum at around  $x = 0.06$ ; over this value, it slowly reduces, while the red and infrared ones continue to increase and finally get a maximum at approximately  $x = 0.24$ , at which the green emission nearly disappears. The reduction for the green emission with increasing  $\text{Er}^{3+}$  concentration can be justified by the cross relaxation  $^4F_{5/2} + ^4I_{15/2} \rightarrow ^4F_{9/2} + ^4I_{13/2}$  (see Figure 10), which results in the increase of 663 nm ( $^4F_{9/2} \rightarrow ^4I_{15/2}$ ) and 1540 nm ( $^4I_{13/2} \rightarrow ^4I_{15/2}$ ) luminescence of  $\text{Er}^{3+}$  ions.

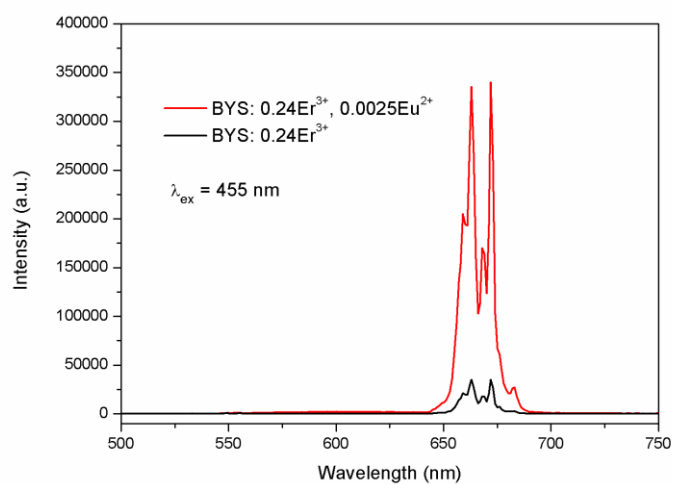

**Figure S4** Emission spectra of BaY<sub>2</sub>S<sub>4</sub>: 0.24Er<sup>3+</sup> and BaY<sub>2</sub>S<sub>4</sub>: 0.24Er<sup>3+</sup>, 0.0025Eu<sup>2+</sup> phosphors upon the excitation of 455 nm. Integrated red emission intensity of Er<sup>3+</sup> enhances about tenfold by introduction of Eu<sup>2+</sup> ions.
